# Supplementary material for: Cu,Zn Superoxide Dismutase Genes in Tribolium castaneum: Evolution, Molecular Characterisation, and Gene Expression during Immune Priming
Source: PubMed Central journal article supplement (PMC5763126; doi:10.3389/fimmu.2017.01811), 2017-12-18
Supplement: Data_Sheet_1.pdf [file Data_Sheet_1.pdf]

**Supplementary material 3:** CLUSTAL multiple sequence alignment of intracellular TcSOD a) and extracellular TcSods b) with respective SODs from other metazoan species.

**A)**

```

Tribolium castaneum SODa      MPTKAVCVL--NGEVKGTIFFFTQENKAPVQVTGEVSGLKKGLHGFHIEFEGDNTNGCIS
Xenopus laevis IC-SOD       M-VKAVCVLAGSGDVKGVVHFEQQDE-GAVSVEGKIEGLTDGLHGFHIEVFGDNTNGCMS
Homo sapiens IC-SOD        MATKAVCVLKGDPVQGIINFEQKESNGPVKVGSIKGLTEGLHGFHVHEFGDNTAGCTS
Bos taurus IC-SOD         MATKAVCVLKGDPVQGTIHFEAKGD--TVVVVTGSITGLTEGDHGFHVHQFGDNTQGCTS
* .***** . * *: * : . * * * . : * * . * * * * : * * * * * * * *

```

```

Tribolium castaneum SODa      AGA:FNPHGKD:GGPTHVVRHVGDLGNIEAGGDGVAKVGITDKFISLEGEHSIIGRTLLVV
Xenopus laevis IC-SOD       AGS:FNPENKN:GAPGDTDRHVGDLGNVTAEG-GVAQFKITDSLISLKGPNSIIGRTAVV
Homo sapiens IC-SOD        AGP:FNPLSRK:GGPKDEERHVGDLGNVTADKGVADVSVIEDSVISLSGDHCIIIGRTLVV
Bos taurus IC-SOD         AGP:FNPLSKK:GGPKDEERHVGDLGNVTADKNGVAIVDIVDPLISLSGEYSIIGRTMVV
** .***** ...**.*      *****: * *** . * * .***.* .***** **

```

```

Tribolium castaneum SODa      HADPDDLGQGGHELSKTGNAGARLACGVVGITKA
Xenopus laevis IC-SOD       HEKADDLGKGGNDESLKGNAGGRLACGVIGYSP-
Homo sapiens IC-SOD        HEKADDLGKGGNEESTKGNAGSRLACGVIGIAQ-
Bos taurus IC-SOD         HEKPDLLGRGGNEESTKGNAGSRLACGVIGIAK-
* . .*****.**.: * .*****.*****:* :

```

bold = upper & lower rim

grey highlight = beta sheet, 3/10 helix & alpha helix

dark grey highlight = conserved region for ion binding

**B)**

```
TcSODb1 MFKLFVLALCATATLATVEKA-----
TcSODb2 MFKLFVLALCATATLATVEKA-----
TcSODc MFKSVVF-LCTLVTIKVNQASMSQTLAVRNALYQVPGLGNRPLIIKMPYGVENYQSDLYE
Homo_sapiens_EC-SOD MLAL----LCSCLLLAAGASD-----AWTGEDSAEPNSDSA EWIRDMYAKVTEIWQEVMQ
*: **:
```

```
TcSODb1 -----IVCLKSGD--IDGKITFTQTAEG-----VQVEGVINGLPGKGH
TcSODb2 -----IVCLKSGD--IDGKITFTQTAEG-----VQVEGVINGLPGKGH
TcSODc VYAEPYTFDLRAASAVALIQGEGESAAGEIVFFQRHPP---NGPILVRGNLTDLP PGKH
Homo_sapiens_EC-SOD RRDDDGTLHAACQVQPSATLDAAQPRVTGVVLFRLAPRAKLDAFFALEGFPTEPNSSSR
.: * : * * . : * . . . .
```

```
TcSODb1 GFHIHEK GALGDSCKDAGGHFNPDKKD GAPEDAVR VGD LGNI IADDDKKVAHVNI SDKI
TcSODb2 GFHIHEK GALGDSCKDAGGHFNPDKKD GAPEDAVR VGD LGNI IADDDKKVAHVNI SDKI
TcSODc GLHIHQSGDLRQCDKLGPFHNPYLLQGGPSDPVR VGD LGNIEVEEDGSVEFNIADPL
Homo_sapiens_EC-SOD AIHVHQFGDLSQCESTGPHYNPLAVP-----PQPGDFGNFAVRDGS LWRYRAG--L
.:*: * * :. * . * * : * * * * * : * * : * * : . . :
```

```
TcSODb1 IS-LNGEHSII GRAVVVHEGEDDLGKGNFNDSKTTGHAGARLVCGVIGIASDGTETCPEG
TcSODb2 IS-LNGEHSII GRAVVVHEGEDDLGKGNFNDSKTTGHAGARLVCGVIGIA-----
TcSODc LSLMGGPRGIVGRSIVISGNPDDLGRGGTAESLVNGDSGKPIACGVIAYIK-----
Homo_sapiens_EC-SOD AASLAGPHSIVGRAVVVHEGEDDLGRGGNQASVENGNAGRRLACCVVGVCGPGLWERQAR
: : * ..* : * * : * . * * * . * * . * : * : * * * .
```

```
TcSODb1 PGNIAISTTGNYFLLFTGLYTLFLNLRF
TcSODb2 -----
TcSODc -----
Homo_sapiens_EC-SOD EHSERKKRRRESECKAA-----
```

underlined = cleavage site predicted by signalP4.0

bold = upper & lower rim

grey highlight = beta sheet, 3/10 helix & alpha helix

dark grey highlight = conserved region for ion binding
