# Supplementary material for: Cu,Zn Superoxide Dismutase Genes in Tribolium castaneum: Evolution, Molecular Characterisation, and Gene Expression during Immune Priming
Source: PubMed Central journal article supplement (PMC5763126; doi:10.3389/fimmu.2017.01811), 2017-12-18

**Supplementary material 5: attacin 2 gene expression 1 day post infection.**

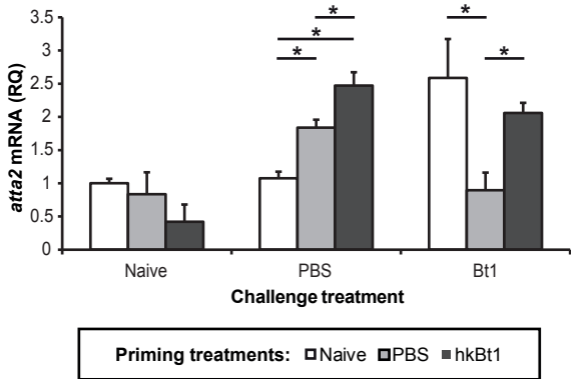

Supplement: Data_Sheet_3.pdf [file Data_Sheet_3.pdf]
